# Supplementary material for: Bacterial synthesis of anisotropic gold nanoparticles
Source: Springer Nature journal article supplement (doi:10.1007/s00253-025-13438-w), 2025-03-10
Supplement: MOESM1 [file 253_2025_13438_MOESM1_ESM.pdf]

## Bacterial synthesis of anisotropic gold nanoparticles

Islam M. Ahmady<sup>1,2</sup>, Javad B. M. Parambath<sup>3</sup>, Elsiddig A. E. Elsheikh<sup>1</sup>, Gwangmin Kim<sup>4</sup>,  
Changseok Han<sup>4,5</sup>, Alejandro Pérez-García<sup>2\*</sup>, Ahmed A. Mohamed<sup>3\*</sup>

|                                      |                           |                           |
|--------------------------------------|---------------------------|---------------------------|
| <sup>1,2</sup> Islam M. Ahmady       | ORCID 0000-0003-0241-148X | (ialtayeb@sharjah.ac.ae)  |
| <sup>3</sup> Javad B. M. Parambath   | ORCID 0000-0002-5069-2143 | (jbasil@sharjah.ac.ae)    |
| <sup>1</sup> Elsiddig A. E. Elsheikh | ORCID 0000-0002-2949-5567 | (eelsheikh@sharjah.ac.ae) |
| <sup>4</sup> Gwangmin Kim            | ORCID 0000-0003-0653-222X | (rhkdals0731@gmail.com)   |
| <sup>4,5</sup> Changseok Han         | ORCID 0000-0002-8636-2859 | (hanck@inha.ac.kr)        |
| <sup>2</sup> Alejandro Pérez García  | ORCID 0000-0002-1065-0360 | (aperez@uma.es)           |
| <sup>3</sup> Ahmed A. Mohamed        | ORCID 0000-0001-7369-3117 | (amohamed61@gmail.com)    |

<sup>1</sup>Department of Applied Biology, College of Sciences, University of Sharjah, Sharjah 27272, United Arab Emirates

<sup>2</sup>Departamento de Microbiología, Universidad de Málaga, and Instituto de Hortofruticultura Subtropical y Mediterránea “La Mayora” (IHSM-UMA-CSIC), 29071 Málaga, Spain

<sup>3</sup>Center for Advanced Materials Research, Research Institute of Sciences and Engineering, University of Sharjah, Sharjah 27272, United Arab Emirates

<sup>4</sup>Program in Environmental and Polymer Engineering, Graduate School of INHA University, 100 Inha-ro, Michuhol-gu, Incheon 22212, Korea

<sup>5</sup>Department of Environmental Engineering, INHA University, 100 Inha-ro, Michuhol-gu, Incheon 22212, Korea

\*Co-corresponding authors

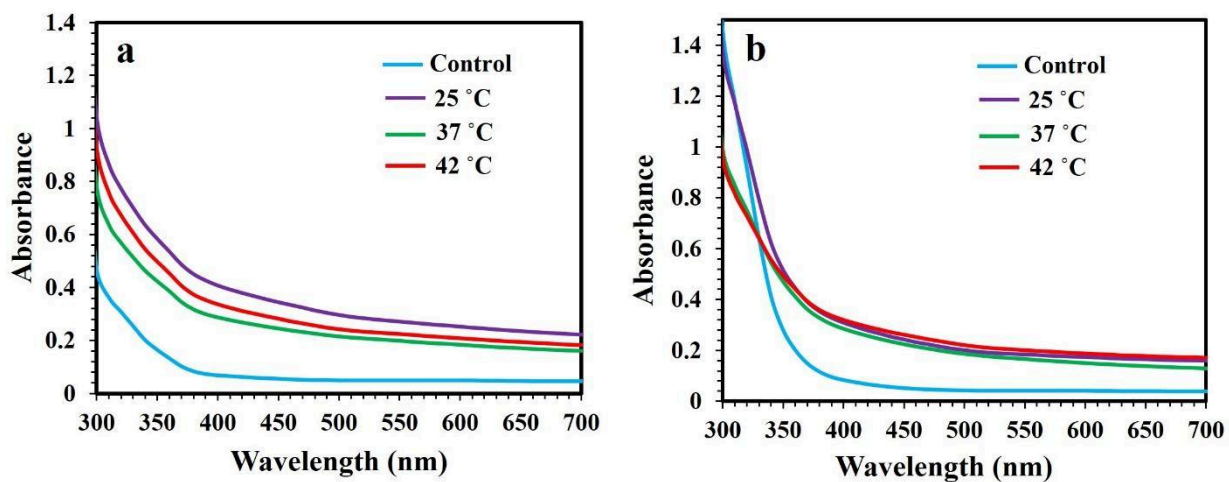

**FIGURE S1** UV-vis investigation of attempt synthesis of AuNPs using *P. aeruginosa* ATCC 27853. UV-vis recorded after 48 h of incubation corresponding to bacterial cell suspensions of  $1.5 \times 10^8$  CFU/mL (a) and  $3 \times 10^8$  CFU/mL (b), incubated with 0.5 mM of DS-AuCl<sub>4</sub> at 25 °C, 37 °C, and 42 °C. No nanoparticle peak was observed.

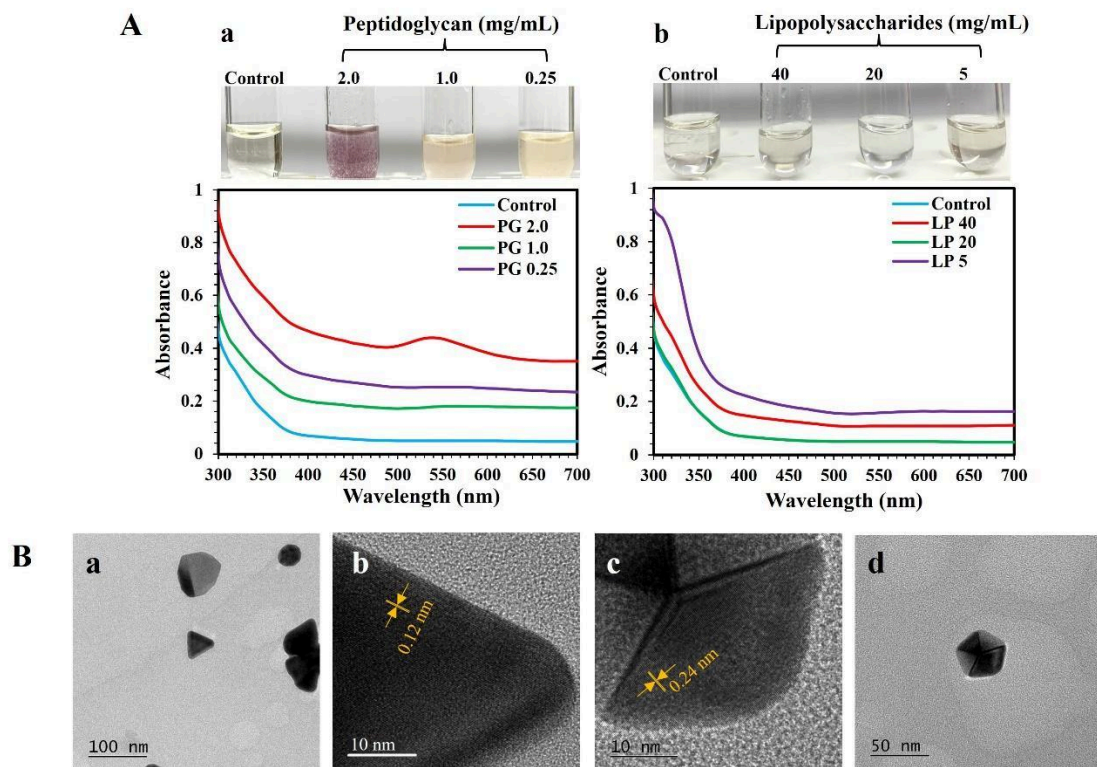

**FIGURE S2** UV-vis and TEM investigation of AuNPs synthesized by peptidoglycan and lipopolysaccharides. (A) UV-vis of AuNPs synthesized using different concentrations of *B. subtilis* peptidoglycan (a) and *E. coli* lipopolysaccharides (b) incubated with 0.5 mM of DS-AuCl<sub>4</sub> at 42 °C (24) h of incubation, and the corresponding test tubes. (B) HR-TEM analysis of synthesized AuNPs using *B. subtilis* peptidoglycan (a-d). Images were taken after one week of incubation at 42 °C. The measured lattice spacing for some AuNPs is shown in orange.

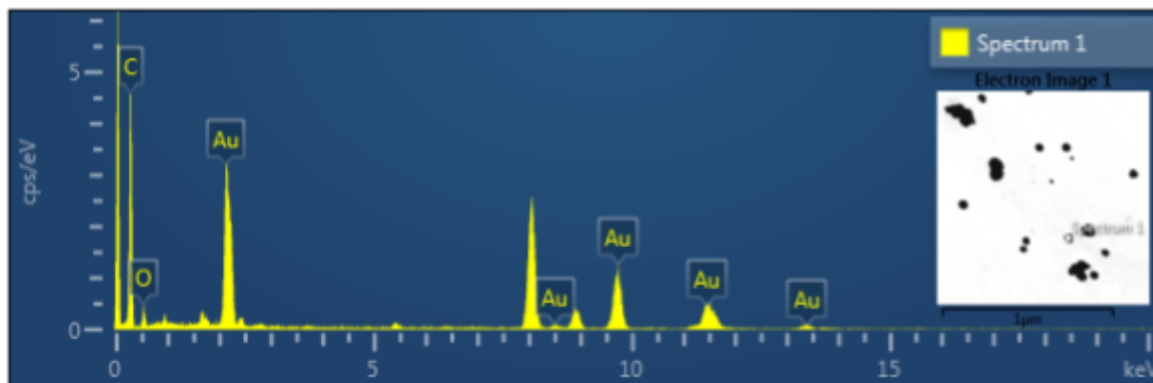

**FIGURE S3** EDS of AuNPs synthesized using peptidoglycan. EDS was recorded after 2 mg/mL of *Bacillus* peptidoglycan incubated with 0.5 mM of DS-AuCl<sub>4</sub> at 37 °C (24 h).

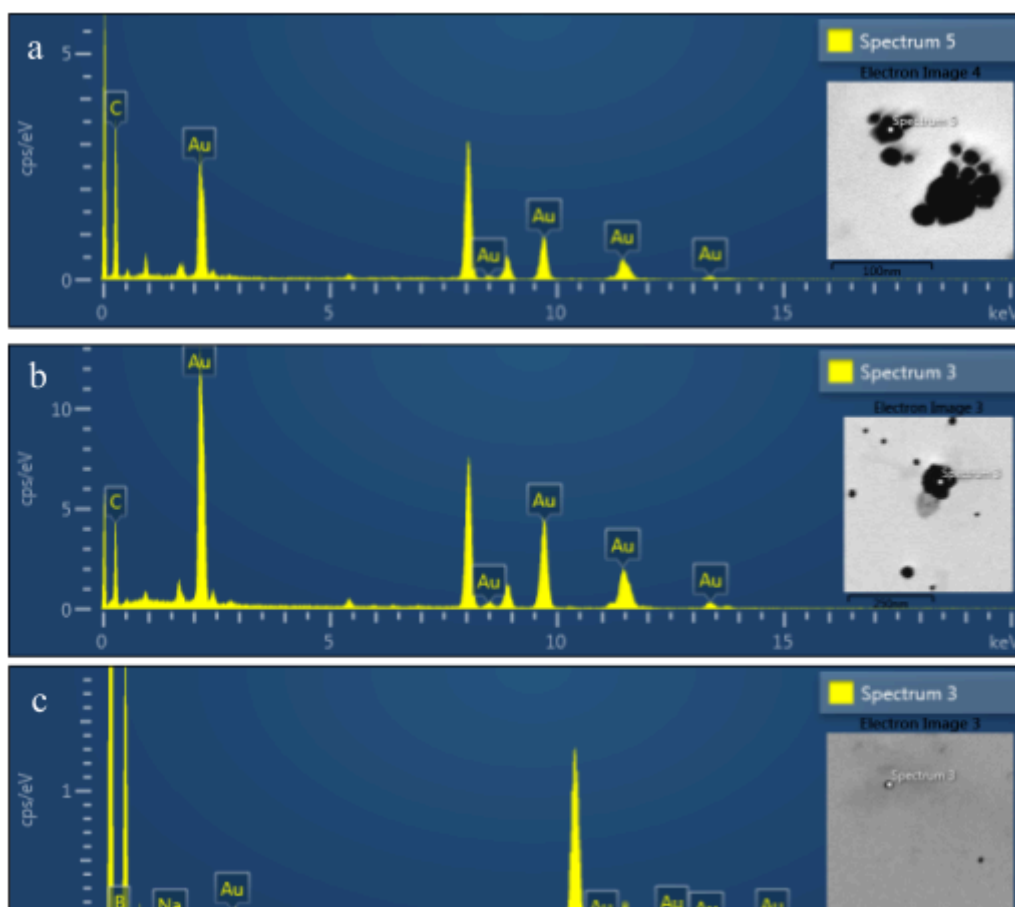

**FIGURE S4** EDS analysis of AuNPs synthesized using extracellular *P. aeruginosa* ATCC 27853 metabolites. EDS after incubation of extracellular metabolites of 24 h (a) and 96 h (b) of growth with 0.5 mM DS-AuCl<sub>4</sub> at 42 °C. Sodium borohydride (c) was included as positive control.

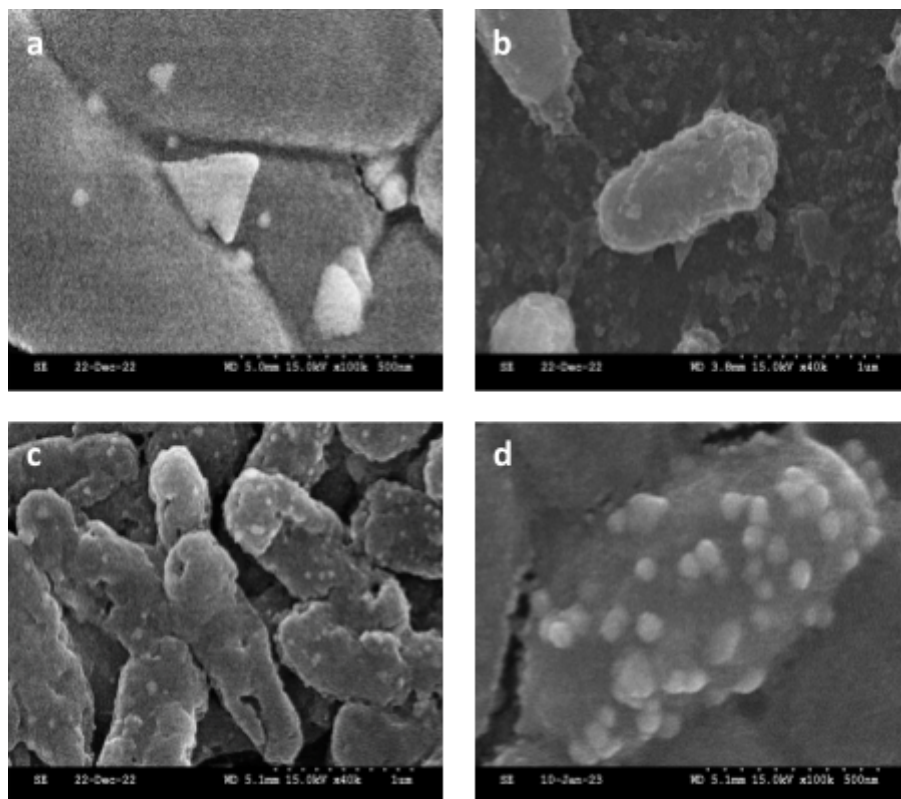

**FIGURE S5** FE-SEM analysis of AuNPs synthesized using *P. aeruginosa* ATCC 27853. Images were taken from AuNPs obtained under different experimental conditions. After 24 h (42 °C) (a), at pH 12.7 (b), by autoclave-dead bacteria (c), and by mechanically lysed bacteria (d).

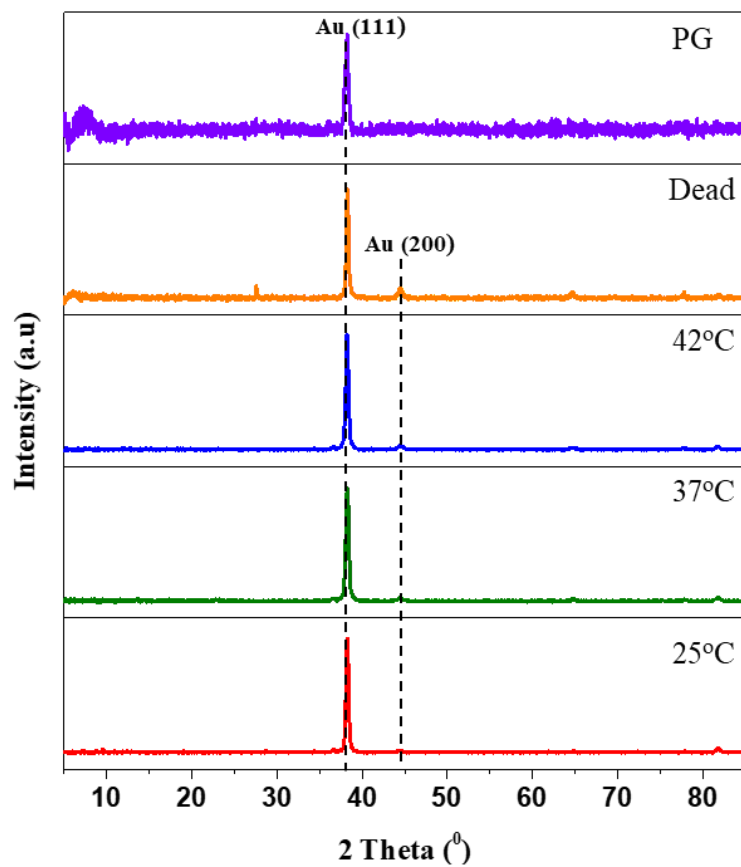

**FIGURE S6** XRD of AuNPs obtained under different experimental conditions. P-XRD diffractograms of the AuNPs synthesized at 25 °C (48 h), 37 °C (24 h), and 42 °C (24 h), using autoclave-dead bacteria and *Bacillus* peptidoglycan (PG).

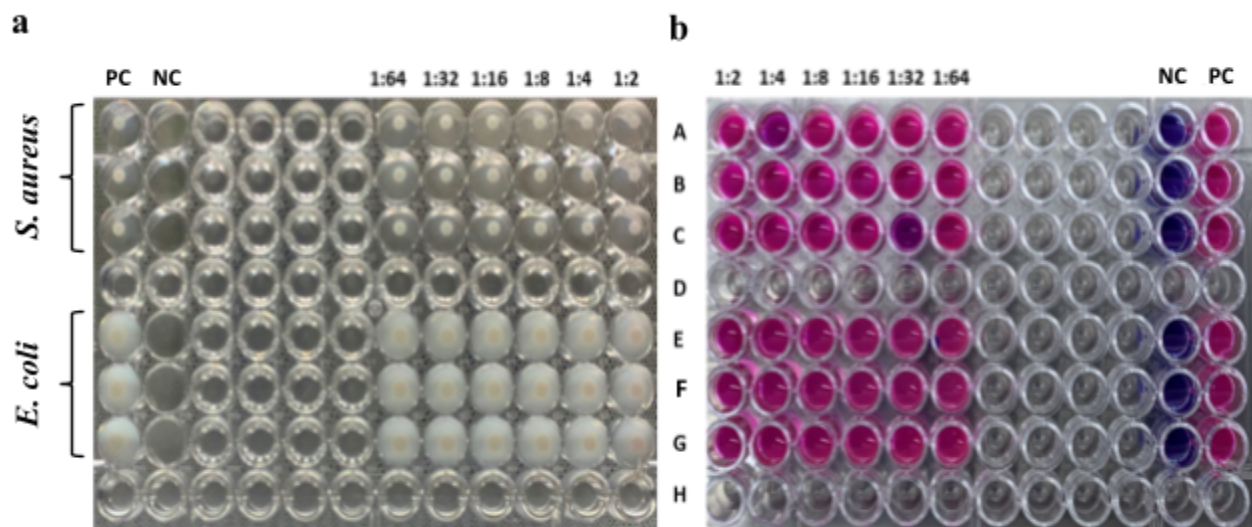

**FIGURE S7.** Antibacterial activities of AuNPs against *S. aureus* and *E. coli* using microplate assays. AuNPs produced by live cells were diluted twofold from 1:2 to 1:64 in Muller Hinton broth. (a) A 96-well plate showing bottom and turbidity, indicating growth for both bacterial species. (b) A 96-well plate treated with resazurin showing a reduction from blue to purple, indicating active bacterial growth in both cases. Bacteria were tested in triplicates: *S. aureus* was tested from rows A to C, and *E. coli* from rows E to G. PC, positive control with bacteria and no AuNPs; NC, negative control without bacteria. Similar results were observed when AuNPs produced using extracellular metabolites were tested (data not shown).
